# Supplementary material
Source: PubMed Central journal article supplement (PMC8743900)
Supplement: ort-0044-0613-s01.pdf [file ort-0044-0613-s01.pdf]

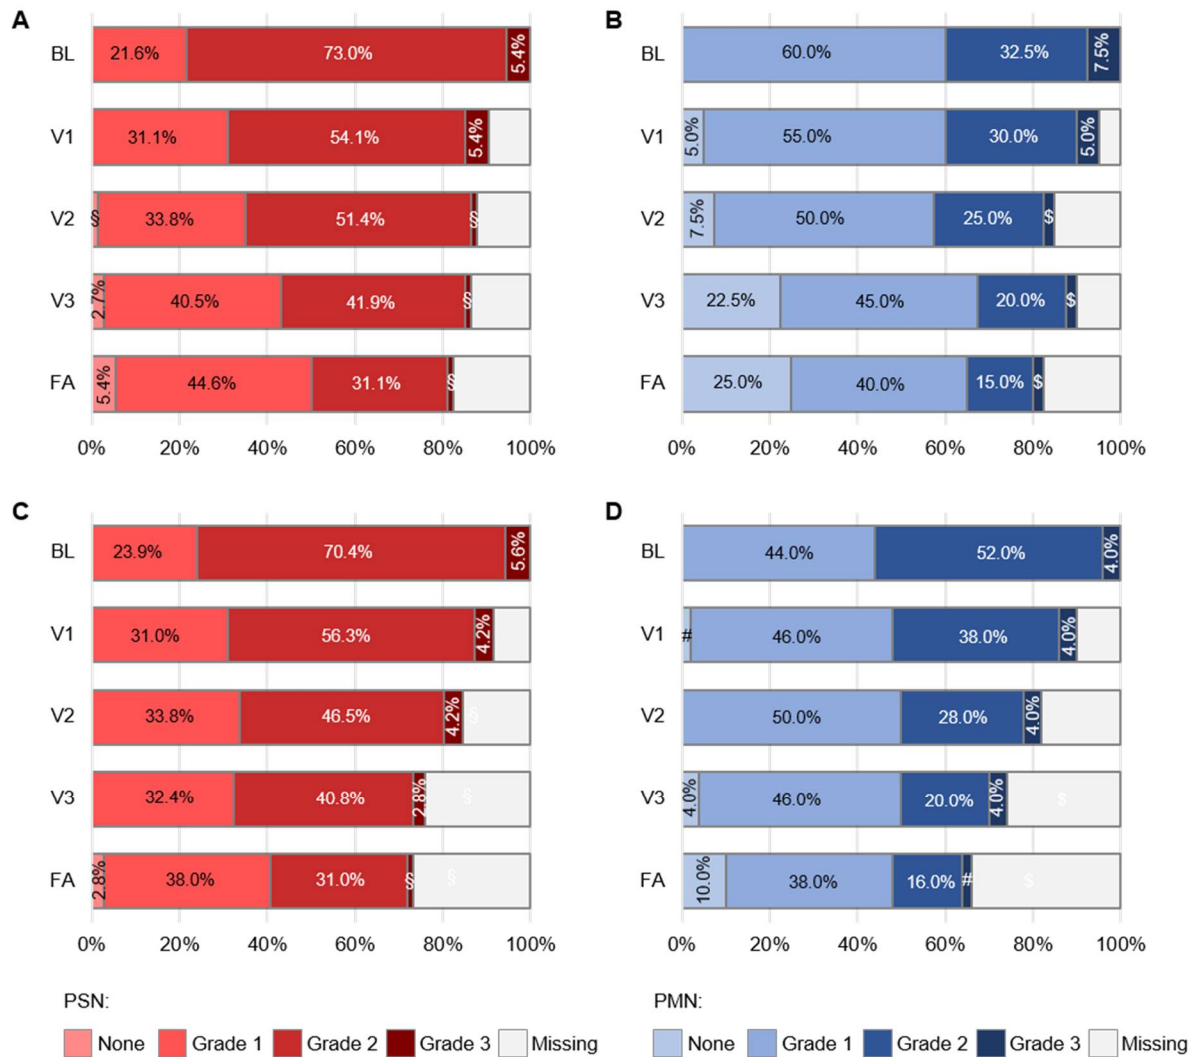

**Supplementary Fig. 1: Severity of PSN (A, C) and PMN (B, D) according to CTCAE in patients with paclitaxel-induced PN (A, n=74; B, n=40) and oxaliplatin-induced PN (C, n=71; D, n=50) at baseline (BL), visit 1 (V1), visit 2 (V2), visit 3 (V3) and at final assessment (FA); §, 1.4% | #, 2.0% | \$, 2.5%**
