# Supplementary material
Source: PubMed Central journal article supplement (PMC8743900)
Supplement: ort-0044-0613-s03.pdf [file ort-0044-0613-s03.pdf]

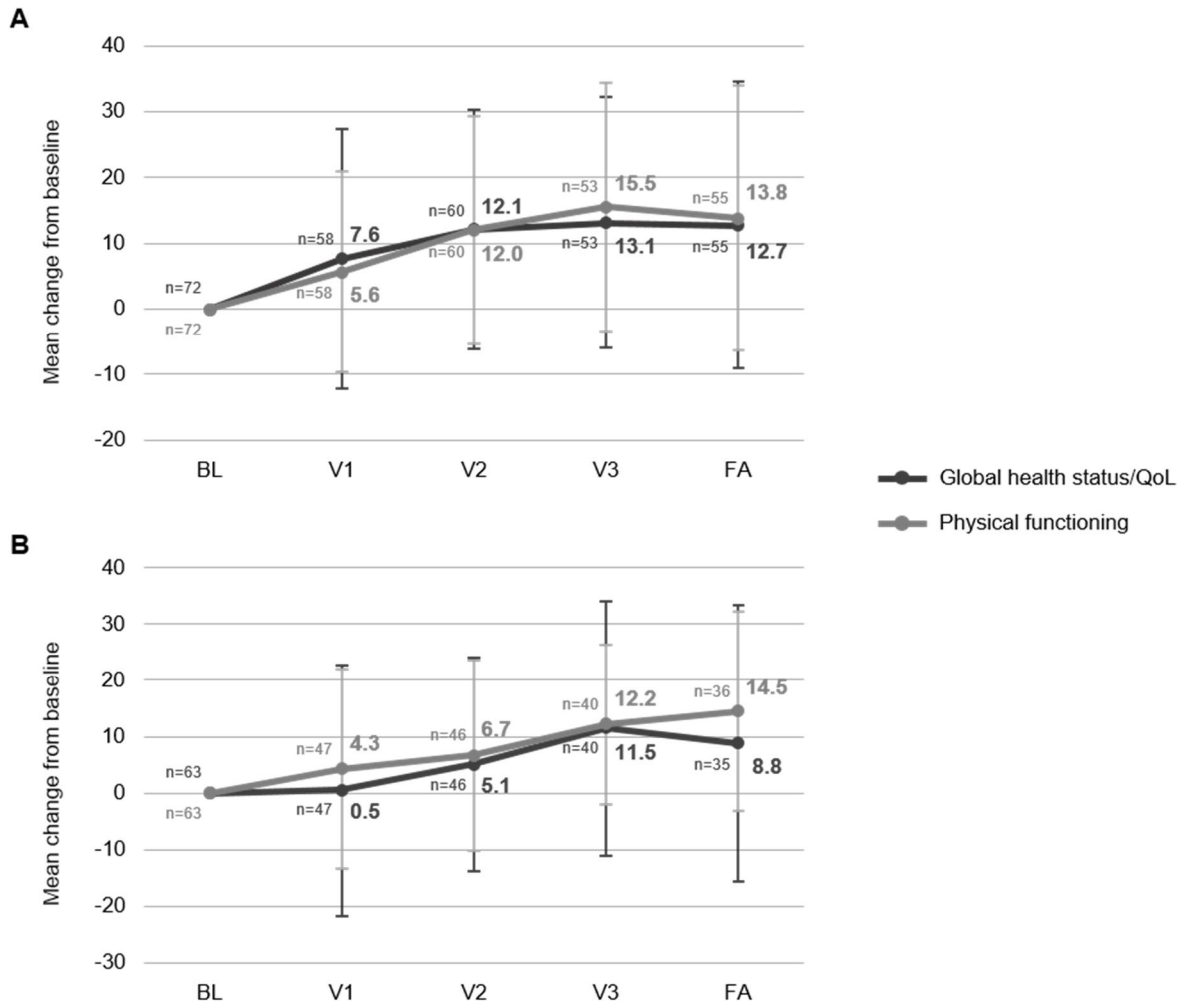

**Supplementary Fig. 2: Patient-reported outcomes: EORTC QLQ-C30, change from baseline in global health status/QoL and physical functioning scale (mean, standard deviation) in patients with paclitaxel-induced PN (A, N=75) and oxaliplatin-induced PN (B, N=71); BL, baseline | FA, final assessment | QoL, quality of life | V1, visit 1 | V2, visit 2 | V3, visit 3**
